# Supplementary material for: Are Epiphytic Microbial Communities in the Carposphere of Ripening Grape Clusters (Vitis vinifera L.) Different between Conventional, Organic, and Biodynamic Grapes?
Source: PubMed Central journal article supplement (PMC4976965; doi:10.1371/journal.pone.0160852), 2016-08-08
Supplement: pone.0160852.s002.pdf [file pone.0160852.s002.pdf]

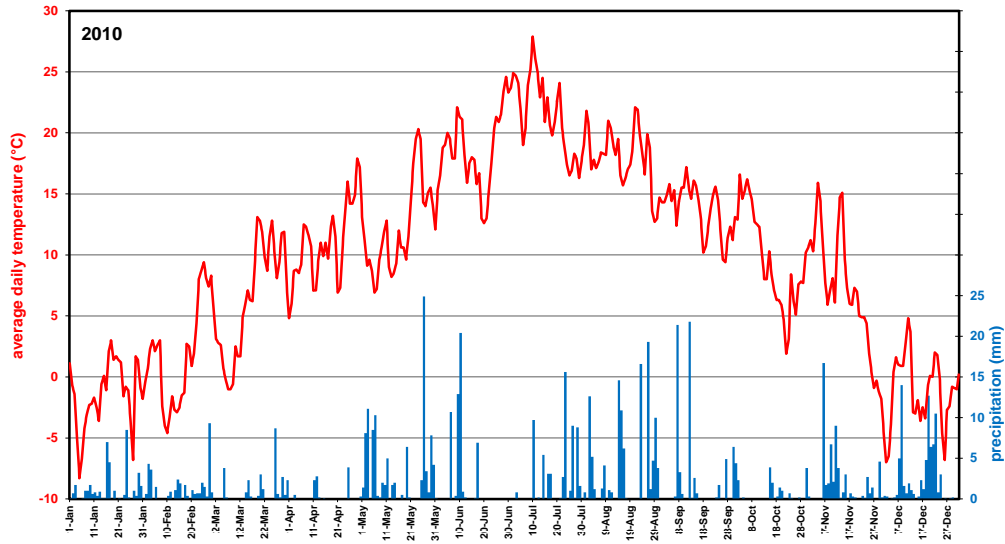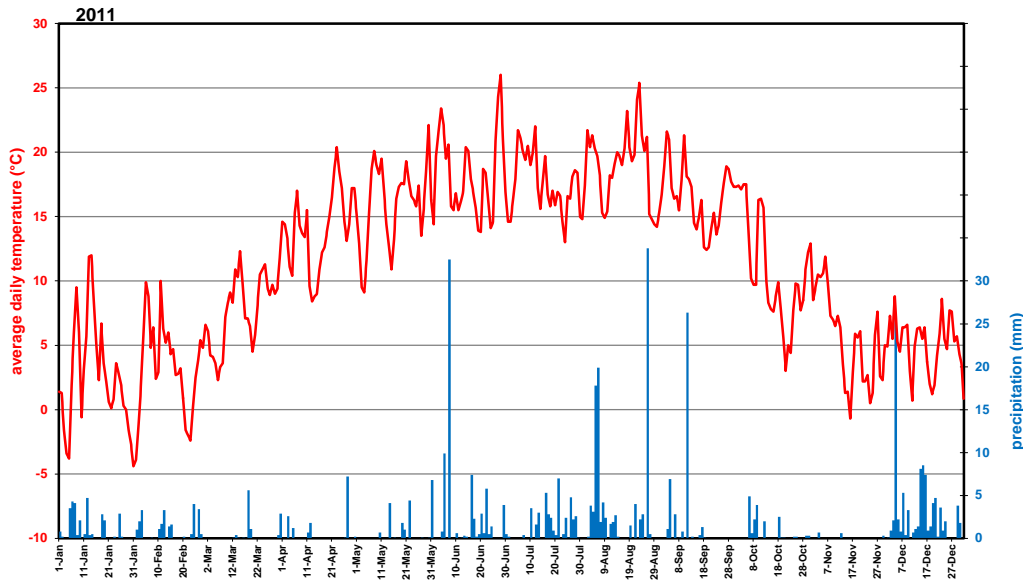

**S2 Fig.** Climatic conditions 2010 and 2011, obtained from a weather station of the German meteorological service DWD (Deutscher Wetterdienst) located next to the experimental vineyard in Geisenheim. The three sampling dates are marked with an arrow.
